# Supplementary material
Source: publisher figshare collection journal article supplement (https://tandf.figshare.com/articles/dataset/_/7928624)
Supplement: Supplementary file 1 [file 1]

Archive with 8 entries (8 files):
- REV miRCATCHv2.0 Suppl figures 150319.pdf
- miRCATCHv2.0 Suppl Table S1 140319.pdf
- miRCATCHv2.0 Suppl Table S2 140319.pdf
- miRCATCHv2.0 Suppl Table S3 140319.pdf
- miRCATCHv2.0 Suppl Table S4 140319.pdf
- miRCATCHv2.0 Suppl Table S5 140319.pdf
- miRCATCHv2.0 Supplementary MM 150319.pdf
- miRCATCHv2.0 Supplementary step-by-step protocol 150319.pdf
