# Supplementary material
Source: publisher figshare collection journal article supplement (https://tandf.figshare.com/articles/dataset/_/7928624)
Supplement: Supplementary file 1 [file 1 › miRCATCHv2.0 Suppl Table S1 140319.pdf]

**Supplementary Table S1. Sequence and location of biotinylated probes.**

**X1 3'UTR probes**

| Probe # | Probe (5'->3') sequence | Probe Position* | Percent GC |
|---------|-------------------------|-----------------|------------|
| 1       | ACAGAACTGTGTTTTGATGT    | 60              | 35         |
| 2       | ATTCTTTCCTCTTTTGTTGG    | 153             | 35         |
| 3       | ACTTTCCATAGCAAATCTCC    | 328             | 40         |
| 4       | TGCTTGGTGATTGAAACTGC    | 408             | 45         |
| 5       | CATAGAAAGGGCAAGCTGCA    | 513             | 50         |
| 6       | AGACACATCTACTCACCCT     | 597             | 45         |
| 7       | CCTCAGTGAGCAAGGAAACA    | 677             | 50         |
| 8       | CACTTATCTTCATTGCTGGA    | 757             | 40         |
| 9       | AGTAGCCGCATAAGTAGTTG    | 860             | 45         |
| 10      | GGATATATAATTCTGGTGGG    | 1075            | 40         |
| 11      | TGCTAAGACTCCTCATATTT    | 1158            | 35         |
| 12      | TGTGGGATATAGTGTTAGGA    | 1271            | 40         |

**Control probe**

|     |                           |
|-----|---------------------------|
| SCR | GTGAGGCGTTGTAAGAGTGGTAAAG |
|-----|---------------------------|
