# Supplementary material
Source: publisher figshare collection journal article supplement (https://tandf.figshare.com/articles/dataset/_/7928624)
Supplement: Supplementary file 1 [file 1 › miRCATCHv2.0 Suppl Table S2 140319.pdf]

**Supplementary Table S2. Correlation between ODD and EVEN probe sets.**

|                        | Pre X1 scaling | Post X1 scaling |
|------------------------|----------------|-----------------|
| ODD vs EVEN Capture #1 | $r=0.69^{***}$ | $r=0.72^{***}$  |
| ODD vs EVEN Capture #2 | $r=0.69^{***}$ | $r=0.80^{***}$  |
| ODD vs EVEN Capture #3 | $r=0.71^{***}$ | $r=0.74^{***}$  |

Pearson's correlation coefficient  $r$ , \*\*\*for  $p<0.00001$
