# Supplementary material
Source: publisher figshare collection journal article supplement (https://tandf.figshare.com/articles/dataset/_/7928624)
Supplement: Supplementary file 1 [file 1 › miRCATCHv2.0 Suppl Table S3 140319.pdf]

Supplementary Table S3. List of the 94 microRNAs captured using ODD and EVEN probes and their prioritization according to the comparison with the miRNome.

| A                                | B           | C           | D            | E           | F           | G             | H   | I           | J     | K          | L        | M             | N   |
|----------------------------------|-------------|-------------|--------------|-------------|-------------|---------------|-----|-------------|-------|------------|----------|---------------|-----|
| Row.names                        | mean.ODD    | sd.ODD      | ind.mean.ODD | mean.EVEN   | sd.EVEN     | ind.mean.EVEN | D-G | mean(B,E)   | ind.I | mean.A375  | sd.A375  | ind.mean.A375 | M-I |
| hsa-mir-1246,hsa-miR-1246        | 2381.662823 | 1265.450117 | 27           | 1218.699541 | 1265.450117 | 31            | 4   | 1800.181182 | 28    | 8.31332896 | 1.575896 | 111           | 83  |
| hsa-mir-619,hsa-miR-619-5p       | 1591.979461 | 681.4282848 | 38           | 773.3013043 | 681.4282848 | 43            | 5   | 1182.640383 | 40    | 3.85355351 | 1.038416 | 114           | 74  |
| hsa-mir-1260a,hsa-miR-1260a      | 1235.743755 | 562.326668  | 45           | 765.2960708 | 562.326668  | 44            | 1   | 1000.519913 | 46    | 3.54820316 | 1.153911 | 117           | 71  |
| hsa-mir-7704,hsa-miR-7704        | 1307.888003 | 687.4395499 | 43           | 790.5719353 | 687.4395499 | 42            | 1   | 1049.229969 | 44    | 5.67192512 | 1.27487  | 113           | 69  |
| hsa-mir-5096,hsa-miR-5096        | 998.749273  | 570.6051992 | 53           | 653.7089137 | 570.6051992 | 52            | 1   | 826.2290933 | 52    | 2.03238645 | 0.799321 | 119           | 67  |
| hsa-mir-4508,hsa-miR-4508        | 379.2793755 | 355.438986  | 74           | 228.9518283 | 355.438986  | 75            | 1   | 304.1156019 | 72    | 0          | 0        | 133           | 61  |
| hsa-mir-1273f,hsa-miR-1273f      | 343.4887283 | 293.9530177 | 76           | 271.8975902 | 293.9530177 | 69            | 7   | 307.6931593 | 71    | 0.17594295 | 0.133336 | 127           | 56  |
| hsa-mir-1260b,hsa-miR-1260b      | 1260.675938 | 531.0577553 | 44           | 855.4224693 | 531.0577553 | 41            | 3   | 1058.049204 | 43    | 160.937739 | 36.34623 | 96            | 53  |
| hsa-mir-423,hsa-miR-423-5p       | 7980.391396 | 2112.445203 | 11           | 6568.97974  | 2112.445203 | 9             | 2   | 7274.685568 | 10    | 1718.27254 | 193.3858 | 61            | 51  |
| hsa-mir-184,hsa-miR-184          | 350.0432776 | 302.2969448 | 75           | 197.6679201 | 302.2969448 | 77            | 2   | 273.8555988 | 78    | 0.12483447 | 0.07529  | 129           | 51  |
| hsa-mir-3651,hsa-miR-3651        | 588.3836501 | 353.7764173 | 64           | 267.5626846 | 353.7764173 | 70            | 6   | 427.9731673 | 67    | 3.69964595 | 2.76441  | 115           | 48  |
| hsa-mir-5701-1,hsa-miR-5701      | 385.1660782 | 79.84115992 | 73           | 248.8391941 | 79.84115992 | 72            | 1   | 317.0026362 | 70    | 6.7784071  | 4.750484 | 112           | 42  |
| hsa-mir-320b-1,hsa-miR-320b      | 462.1862116 | 233.6238896 | 67           | 473.8659202 | 233.6238896 | 61            | 6   | 468.0260659 | 63    | 65.6053356 | 9.173867 | 102           | 39  |
| hsa-mir-320b-2,hsa-miR-320b      | 460.2683514 | 235.4350846 | 68           | 473.8659202 | 235.4350846 | 62            | 6   | 467.0671358 | 64    | 65.4188853 | 9.356898 | 103           | 39  |
| hsa-mir-3180-1,hsa-miR-3180-3p   | 841.7803286 | 574.943994  | 56           | 758.4684201 | 574.943994  | 49            | 7   | 800.1243744 | 54    | 306.422526 | 40.62835 | 91            | 37  |
| hsa-mir-3180-4,hsa-miR-3180      | 631.8073747 | 376.946627  | 62           | 632.7129567 | 376.946627  | 54            | 8   | 632.2601657 | 58    | 191.285478 | 21.76172 | 94            | 36  |
| hsa-mir-125b-1,hsa-miR-125b-1-3p | 2588.839103 | 794.4251106 | 26           | 1835.746585 | 794.4251106 | 26            | 0   | 2212.292844 | 26    | 1773.2535  | 489.0322 | 60            | 34  |
| hsa-mir-320a,hsa-miR-320a        | 1582.944098 | 841.7806293 | 39           | 1106.633875 | 841.7806293 | 34            | 5   | 1344.788986 | 36    | 117.04602  | 119.3993 | 67            | 31  |
| hsa-mir-4792,hsa-miR-4792        | 284.1681844 | 96.62593422 | 84           | 161.030009  | 96.62593422 | 83            | 1   | 222.5990967 | 83    | 16.7202072 | 4.100996 | 110           | 27  |
| hsa-mir-146a,hsa-miR-146a-5p     | 1794.099355 | 583.8292583 | 34           | 1177.27246  | 583.8292583 | 32            | 2   | 1485.685907 | 33    | 1808.57204 | 480.5921 | 58            | 25  |
| hsa-mir-181b-1,hsa-miR-181b-5p   | 5045.088689 | 1767.198951 | 18           | 3965.605591 | 1767.198951 | 15            | 3   | 4505.34714  | 17    | 5042.81636 | 1411.872 | 39            | 22  |
| hsa-let-7e,hsa-let-7e-5p         | 1730.084609 | 462.8801435 | 35           | 1079.839616 | 462.8801435 | 35            | 0   | 1404.962112 | 34    | 2144.94554 | 106.135  | 55            | 21  |
| hsa-mir-181b-2,hsa-miR-181b-5p   | 5264.097006 | 1705.155743 | 15           | 3952.990175 | 1705.155743 | 16            | 1   | 4608.54359  | 15    | 5231.36133 | 1484.142 | 35            | 20  |
| hsa-let-7f,hsa-let-7f-5p         | 4820.803938 | 2124.492331 | 19           | 2963.565656 | 2124.492331 | 21            | 2   | 3892.184797 | 21    | 5096.54892 | 1114.294 | 37            | 16  |
| hsa-let-7b,hsa-let-7b-5p         | 1235.180801 | 594.6669644 | 46           | 686.5662147 | 594.6669644 | 51            | 5   | 960.8735088 | 48    | 1186.13276 | 238.5251 | 63            | 15  |
| hsa-mir-584,hsa-miR-584-5p       | 948.6559091 | 543.3689107 | 54           | 765.1307904 | 543.3689107 | 45            | 9   | 856.8933498 | 50    | 1569.11045 | 320.5008 | 62            | 12  |
| hsa-mir-222,hsa-miR-222-3p       | 6732.702686 | 2986.602323 | 13           | 3664.11468  | 2986.602323 | 18            | 5   | 5198.408683 | 13    | 10309.3827 | 1265.534 | 24            | 11  |
| hsa-mir-92b,hsa-miR-92b-3p       | 15084.49894 | 8853.414564 | 6            | 9512.774939 | 8853.414564 | 6             | 0   | 12298.63694 | 6     | 19083.4984 | 1246.653 | 14            | 8   |
| hsa-mir-92a-1,hsa-miR-92a-1-5p   | 216.728336  | 193.6256461 | 90           | 127.2188601 | 193.6256461 | 93            | 3   | 171.973598  | 92    | 85.9625847 | 21.45123 | 99            | 7   |
| hsa-mir-25,hsa-miR-25-3p         | 1888.446759 | 893.6918707 | 32           | 1145.84406  | 893.6918707 | 33            | 1   | 1517.14541  | 32    | 5056.12816 | 825.5464 | 38            | 6   |
| hsa-let-7a-3,hsa-let-7a-5p       | 15863.36799 | 6286.559754 | 4            | 10883.69786 | 6286.559754 | 3             | 1   | 13373.53293 | 4     | 41878.0612 | 2051.394 | 9             | 5   |
| hsa-mir-181a-1,hsa-miR-181a-5p   | 11391.56723 | 3983.655706 | 8            | 8156.117947 | 3983.655706 | 7             | 1   | 9773.842587 | 7     | 23301.599  | 6432.398 | 12            | 5   |
| hsa-mir-423,hsa-miR-423-3p       | 1477.147045 | 994.5636263 | 40           | 960.3712148 | 994.5636263 | 37            | 3   | 1218.75913  | 39    | 3844.98619 | 693.2723 | 44            | 5   |
| hsa-let-7a-2,hsa-let-7a-5p       | 15884.37871 | 6354.864736 | 3            | 10880.8711  | 6354.864736 | 4             | 1   | 13382.6249  | 3     | 41941.3423 | 2055.957 | 7             | 4   |
| hsa-mir-133a-1,hsa-miR-133a-3p   | 90.84563904 | 81.94423688 | 123          | 76.04758612 | 81.94423688 | 114           | 9   | 83.44661258 | 119   | 0.7940686  | 0.545943 | 123           | 4   |
| hsa-let-7a-1,hsa-let-7a-5p       | 15848.02511 | 6306.617713 | 5            | 10876.02665 | 6306.617713 | 5             | 0   | 13362.02588 | 5     | 41903.7266 | 2054.294 | 8             | 3   |
| hsa-mir-182,hsa-miR-182-5p       | 2309.307608 | 703.8886926 | 29           | 1809.961086 | 703.8886926 | 27            | 2   | 2055.134347 | 27    | 6880.27667 | 437.95   | 30            | 3   |
| hsa-mir-125b-1,hsa-miR-125b-5p   | 2092.036649 | 965.0392489 | 30           | 1306.453728 | 965.0392489 | 28            | 2   | 1699.245189 | 30    | 5424.48007 | 1311.504 | 33            | 3   |
| hsa-mir-125b-2,hsa-miR-125b-5p   | 2058.07812  | 980.2547927 | 31           | 1302.61182  | 980.2547927 | 29            | 2   | 1680.34812  | 31    | 5353.61112 | 1120.972 | 34            | 3   |
| hsa-mir-1307,hsa-miR-1307-3p     | 564.6157385 | 496.5175059 | 65           | 342.8561989 | 496.5175059 | 63            | 2   | 453.7359687 | 66    | 1058.53887 | 131.0033 | 69            | 3   |
| hsa-mir-106b,hsa-miR-106b-3p     | 306.619553  | 137.2178621 | 80           | 240.1591316 | 137.2178621 | 74            | 6   | 273.3893423 | 79    | 552.005666 | 99.00282 | 82            | 3   |
| hsa-let-7f-2,hsa-let-7f-5p       | 3114.858505 | 831.5362094 | 22           | 4854.529437 | 831.5362094 | 13            | 9   | 3984.693971 | 19    | 11079.9121 | 2839.646 | 22            | 3   |
| hsa-let-7f-1,hsa-let-7f-5p       | 3080.899976 | 868.3831962 | 23           | 4742.65301  | 868.3831962 | 14            | 9   | 3911.776493 | 20    | 10935.4827 | 2775.433 | 23            | 3   |
| hsa-mir-204,hsa-miR-204-5p       | 780.5802879 | 475.0304154 | 58           | 611.2177022 | 475.0304154 | 55            | 3   | 695.898995  | 57    | 1808.09003 | 957.9845 | 59            | 2   |
| hsa-mir-92a-1,hsa-miR-92a-3p     | 53926.8046  | 29211.17362 | 1            | 36333.71346 | 29211.17362 | 1             | 0   | 45130.25903 | 1     | 61588.2708 | 10709.45 | 2             | 1   |
| hsa-mir-92a-2,hsa-miR-92a-3p     | 51032.18528 | 28235.10489 | 2            | 34258.82713 | 28235.10489 | 2             | 0   | 42645.5062  | 2     | 53343.5146 | 10734.41 | 3             | 1   |
| hsa-mir-221,hsa-miR-221-3p       | 2936.945371 | 644.6196054 | 24           | 2312.228954 | 644.6196054 | 23            | 1   | 2624.587163 | 24    | 9671.67697 | 1453.707 | 25            | 1   |
| hsa-mir-151a,hsa-miR-151a-5p     | 1806.380436 | 1157.436013 | 33           | 933.079441  | 1157.436013 | 38            | 5   | 1369.72919  | 35    | 5139.94921 | 421.8061 | 36            | 1   |
| hsa-mir-103a-1,hsa-miR-103a-3p   | 1377.331455 | 509.5052301 | 42           | 762.1595032 | 509.5052301 | 47            | 5   | 1069.745353 | 42    | 4274.49331 | 497.4568 | 43            | 1   |
| hsa-mir-103a-2,hsa-miR-103a-3p   | 1379.249315 | 506.4732621 | 41           | 762.1592503 | 506.4732621 | 48            | 7   | 1070.704283 | 41    | 4307.78639 | 495.0626 | 42            | 1   |
| hsa-mir-191,hsa-miR-191-5p       | 11568.60018 | 4661.716852 | 7            | 7536.760316 | 4661.716852 | 8             | 1   | 9552.680246 | 8     | 44600.9707 | 12369.74 | 6             | -2  |
| hsa-mir-3195,hsa-miR-3195        | 52.13533021 | 30.93728917 | 133          | 21.75002878 | 30.93728917 | 132           | 1   | 36.94267949 | 133   | 0          | 0        | 130           | -3  |
| hsa-mir-130b,hsa-miR-130b-3p     | 286.96374   | 202.6493654 | 83           | 145.9423506 | 202.6493654 | 87            | 4   | 216.4530453 | 84    | 573.772976 | 93.24342 | 81            | -3  |
| hsa-mir-21,hsa-miR-21-5p         | 8550.789999 | 3184.774024 | 9            | 6094.970782 | 3184.774024 | 10            | 1   | 7322.880391 | 9     | 44933.9288 | 11380.08 | 5             | -4  |
| hsa-mir-22,hsa-miR-22-3p         | 6223.180367 | 1982.2114   | 14           | 3378.898858 | 1982.2114   | 19            | 5   | 4801.039613 | 14    | 33968.0804 | 5694.499 | 10            | -4  |
| hsa-mir-10a,hsa-miR-10a-5p       | 519.045841  | 2051.193505 | 17           | 3906.346632 | 2051.193505 | 17            | 0   | 4512.696171 | 16    | 24396.6562 | 1579.489 | 11            | -5  |
| hsa-mir-30a,hsa-miR-30a-5p       | 5248.849937 | 2560.220787 | 16           | 3225.39903  | 2560.220787 | 20            | 4   | 4237.124484 | 18    | 19259.7396 | 3559.487 | 13            | -5  |
| hsa-mir-28,hsa-miR-28-3p         | 807.126985  | 246.3030167 | 57           | 327.8858715 | 246.3030167 | 64            | 7   | 567.51577   | 61    | 1919.59147 | 376.2546 | 56            | -5  |
| hsa-mir-151a,hsa-miR-151a-3p     | 1691.154254 | 601.6241428 | 36           | 983.340403  | 601.6241428 | 36            | 0   | 1337.247328 | 37    | 5648.10879 | 384.9032 | 31            | -6  |
| hsa-mir-26a-1,hsa-miR-26a-5p     | 2809.098552 | 1416.242944 | 25           | 2065.431125 | 1416.242944 | 24            | 1   | 2437.264839 | 25    | 12982.3007 | 1274.64  | 19            | -6  |
| hsa-mir-30d,hsa-miR-30d-5p       | 3479.978357 | 1683.198071 | 21           | 2059.168307 | 1683.198071 | 25            | 4   | 2769.573332 | 23    | 14598.2468 | 3601.53  | 17            | -6  |
| hsa-mir-181d,hsa-miR-181d-5p     | 132.9528206 | 86.22040642 | 102          | 91.94431451 | 86.22040642 | 103           | 1   | 112.4485675 | 104   | 142.759137 | 12.25851 | 97            | -7  |
| hsa-mir-10b,hsa-miR-10b-5p       | 3966.876768 | 1499.246851 | 20           | 2620.853949 | 1499.246851 | 22            | 2   | 3293.865359 | 22    | 17309.1376 | 4200.479 | 15            | -7  |
| hsa-mir-107,hsa-miR-107          | 212.5011473 | 38.72108541 | 91           | 143.703628  | 38.72108541 | 88            | 3   | 177.9357551 | 87    | 625.283308 | 68.80088 | 80            | -7  |
| hsa-mir-4448,hsa-miR-4448        | 84.65321077 | 61.65807904 | 124          | 21.75002878 | 61.65807904 | 133           | 9   | 53.20161977 | 132   | 0.51233727 | 0.341658 | 125           | -7  |
| hsa-mir-27b,hsa-miR-27b-3p       | 7172.610196 | 2876.956043 | 12           | 5300.385395 | 2876.956043 | 12            | 0   | 6236.497795 | 12    | 45991.7956 | 5478.083 | 4             | -8  |
| hsa-mir-31,hsa-miR-31-5p         | 1035.283376 | 339.0421654 | 52           | 483.9988421 | 339.0421654 | 60            | 8   | 759.6411089 | 56    | 2596.24481 | 625.4091 | 48            | -8  |
| hsa-mir-378a,hsa-miR-378a-3p     | 938.465291  | 518.8125342 | 55           | 590.2767433 | 518.8125342 | 56            | 1   | 764.3710172 | 55    |            |          |               |     |
