# Supplementary material
Source: publisher figshare collection journal article supplement (https://tandf.figshare.com/articles/dataset/_/7928624)
Supplement: Supplementary file 1 [file 1 › miRCATCHv2.0 Suppl Table S4 140319.pdf]

**Supplementary Table S4. Primers.**

| Name                                  | Sequence (5'→3')        | Purpose                       |
|---------------------------------------|-------------------------|-------------------------------|
| <b>BRAF-X1 NoPROBE F</b>              | CTTCAACAAAAATACCACGAGCA | qRT-PCR of mRNAs              |
| <b>BRAF-X1 NoPROBE R</b>              | TAGCAGCAGTTTCTTTCCATCAT |                               |
| <b>BRAF-X1 Probe3 F</b>               | TCCCAGGAAGAAAGAGGAGAG   |                               |
| <b>BRAF-X1 Probe3 R</b>               | TGGTTAGAAGGGCAAAGTTGA   |                               |
| <b>BRAF-X1 Probe8 F</b>               | CCAAGCAGGCTAGATAGTGC    |                               |
| <b>BRAF-X1 Probe8 R</b>               | CTGGAAGAGCATAGGAGGAA    |                               |
| <b>BRAF-X1-exon18-F</b>               | AGTGCATCAGAACCCTCCTT    |                               |
| <b>BRAF-X1-exon19-R</b>               | CTTGAAGGCTGCAAATTCTC    |                               |
| <b>BRAF-X1-i18-e19_F</b>              | AAACCCTGGCTTCCTCATCT    |                               |
| <b>BRAF-X1-i18-e19_R</b>              | GATGCCTCACGGAACAGTTT    |                               |
| <b>qRT-Renilla-F</b>                  | GAAAGTGAAGGGCCTGCACTTC  |                               |
| <b>qRT-Renilla-R</b>                  | CACTGCTCGTTCTTCAGCACCC  |                               |
| <b>qRT-Firefly-F</b>                  | CCCGCCGCCGTTGTTGTTTGG   |                               |
| <b>qRT-Firefly-R</b>                  | CGCGCAACTTTTCGCGGTTGT   |                               |
| <b>RPLP0 F</b>                        | GGCAGCATCTACAACCCTGA    | qRT-PCR of housekeeping mRNAs |
| <b>RPLP0 R</b>                        | AACATTGCGGACACCCTCC     |                               |
| <b>GAPDH F</b>                        | CGCTCTCTGCTCCTCCTGTT    |                               |
| <b>GAPDH R</b>                        | CCATGGTGTCTGAGCGATGT    |                               |
| <b>HMBS F</b>                         | TCCAAGCGGAGCCATGTCTG    |                               |
| <b>HMBS R</b>                         | AGAATCTTGTCCTGTGGTGGA   |                               |
| <b>SDHA F</b>                         | CCACTCGCTATTGCACACC     |                               |
| <b>SDHA R</b>                         | CACTCCCCATTCTCCATCA     |                               |
| <b>hsa-miR-1246</b>                   | aatggatttttgagcagg      | qRT-PCR of microRNAs          |
| <b>hsa-miR-619-5p</b>                 | gctgggattacagcatgagcc   |                               |
| <b>hsa-miR-1260a</b>                  | atcccacctctgccacca      |                               |
| <b>hsa-miR-7704</b>                   | cggggtcggcgcgacgtg      |                               |
| <b>hsa-miR-5096</b>                   | gtttcaccatgttggtcaggc   |                               |
| <b>hsa-miR-1260b</b>                  | atcccaccactgccaccat     |                               |
| <b>hsa-miR-423-5p</b>                 | tgaggggcagagagcgagacttt |                               |
| <b>hsa-miR-3651</b>                   | catagcccgtcgctggtacatga |                               |
| <b>hsa-miR-5701</b>                   | ttattgtcacgttctgatt     |                               |
| <b>hsa-miR-320b</b>                   | aaaagctgggttgagagggcaa  |                               |
| <b>hsa-mir-3180-1,hsa-miR-3180-3p</b> | tggggcggagcttccggaggcc  |                               |
| <b>hsa-mir-3180-4,hsa-miR-3180</b>    | tggggcggagcttccggag     |                               |
| <b>hsa-miR-125b-1-3p</b>              | acgggttaggctcttgggagct  |                               |
| <b>hsa-miR-320a</b>                   | aaaagctgggttgagagggcga  |                               |
| <b>hsa-miR-4792</b>                   | cggtgagcgctcgctggc      |                               |
| <b>hsa-miR-146a-5p</b>                | tgagaactgaattccatgggtt  |                               |

|                            |                                    |                              |
|----------------------------|------------------------------------|------------------------------|
| <b>hsa-miR-181b-5p</b>     | aacattcattgctgtcggtgggt            | qRT-PCR of housekeeping RNAs |
| <b>hsa-let-7e-5p</b>       | tgaggtaggaggtgtatagtt              |                              |
| <b>hsa-let-7i-5p</b>       | tgaggtagtagttgtgctgtt              |                              |
| <b>hsa-let-7b-5p</b>       | tgaggtagtaggtgtgtggtt              |                              |
| <b>SNO-110 F</b>           | TGATGTCTCCATGTCTCTGAGCAA           |                              |
| <b>SNO-110 R</b>           | TGAATCGAGCACCAGTTACGC              |                              |
| <b>SNO-44 F</b>            | CCTGGATGATGATAAGC                  |                              |
| <b>SNO-44 R</b>            | TGAATCGAGCACCAGTTACGC              |                              |
| <b>SNO-55 F</b>            | AGCCAACCTTGGAGAGCTGAGC             |                              |
| <b>SNO-55 R</b>            | TGAATCGAGCACCAGTTACGC              | MRE deletion                 |
| <b>X1_Del423_F</b>         | CAGTCAACTTAACCACCAGATCAATTTGTGG    |                              |
| <b>X1_Del423_R</b>         | TCTGGTGGTTAAGTTGACTGGCAGACTTTC     |                              |
| <b>X1_Del619_F</b>         | CATACAAGTCTGCCCAGGAAGAAAGAGGAGAGAC |                              |
| <b>X1_Del619_R</b>         | GTCTCTCCTCTTTCTTCTGGGCAGACTTGTATG  |                              |
| <b>X1_Del1246_F</b>        | TCCTGACCTCCTGGCCTTTTGTTTCCTTGC     |                              |
| <b>X1_Del1246_R</b>        | AAAAGGCCAGGAGGTCAGGAAGAAGATGCA     |                              |
| <b>X1_Del1260a_F</b>       | ATGGAGGCTGGTAGATGTGTCTTGGTATGGAG   |                              |
| <b>X1_Del1260a_R</b>       | ACACATCTACCAGCCTCCATTAAATAAAAATA   |                              |
| <b>X1_Del3180_F</b>        | CCTCCGGGGTTTTGTTTCCTTGCTCACTGAGG   |                              |
| <b>X1_Del3180_R</b>        | AGGAAACAAAACCCCGGAGGTCAGGAAGAAGA   |                              |
| <b>X1_Del3651_F</b>        | AGGGCACAAAATAGTATCTAACTAAACCCCCACA |                              |
| <b>X1_Del3651_R</b>        | TAGTTAGATACTATTTTGTGCCCTGGACAAAGTA |                              |
| <b>X1_Del7704_F</b>        | CATCTTCTTCTGGGTCTCTGGCCTTTTGTTTCC  |                              |
| <b>X1_Del7704_R</b>        | GGCCAGAGACCCAGGAAGAAGATGCAGCATGCCC |                              |
| <b>X1_Del-let-7b/e_F</b>   | GTGCTGGCACACATTGCCTTTTGGGTCCAGC    | 3'UTR cloning                |
| <b>X1_Del-let-7b/e_R</b>   | GCTGGACCCAAAAGGCAATGTGTGCCAGCAC    |                              |
| <b>X1 3'UTR SpeIF</b>      | catACTAGTAGAATTTGCAGCCTTCAAGTAGCCA |                              |
| <b>X1 3'UTR HindIIIR</b>   | gcaAAGCTTACCATTAATTGAAAAATTAT      |                              |
| <b>Ref-3'UTR SpeIF</b>     | catACTAGTGCGTTTCCTGTCCACTGAAAC     |                              |
| <b>Ref-3'UTR HindIIIR</b>  | gcaAAGCTTTGGTTCACCTTAAA            |                              |
| <b>SpeI_MEK1_UTR_F</b>     | catACTAGTTAAGTGTTTGGGAAGCAACAAAGAG | sensor cloning               |
| <b>MluI_MEK1_UTR_R</b>     | gcaACGCGTTTTTAATCTAAAAAGGAATGGGCCT |                              |
| <b>3180_sensor_SS</b>      | CTAGTACCCCGCCTCGAAGGCCTCCGGA       |                              |
| <b>3180_sensor_AS</b>      | AGCTTCCGGAGGCCTTCGAGGCGGGGT        |                              |
| <b>3651_sensor_SS</b>      | CTAGTTCATGTACCAGCGACCGGGCTATGA     |                              |
| <b>3651_sensor_AS</b>      | AGCTTCATAGCCCGGTCGCTGGTACATGAA     | BRAFV600E-X1 CDS cloning     |
| <b>SpeI-BRAFV600E-X1-F</b> | gcaACTAGTGCCACCATGGCGGCGCTGAGCG    |                              |
| <b>SalI-BRAFV600E-X1-R</b> | gcaGTCGACCTACTTGAAGGCTGCAATTCTC    |                              |
