# Supplementary material
Source: publisher figshare collection journal article supplement (https://tandf.figshare.com/articles/dataset/_/7928624)
Supplement: Supplementary file 1 [file 1 › miRCATCHv2.0 Suppl Table S5 140319.pdf]

## Supplementary Table S5. siRNAs and si-miRNAs.

### microRNA mimics (si-miRNAs)

| miRNA name                     | mature miRNA seq         | MIMAT         |
|--------------------------------|--------------------------|---------------|
| hsa-miR-1246                   | aauggauuuuuggagcagg      | MIMAT0005898  |
| hsa-miR-619-5p                 | gcuggggaauacaggcaugagcc  | MIMAT0026622  |
| hsa-miR-1260a                  | aucccaccucugccacca       | MIMAT0005911  |
| hsa-miR-7704                   | cggggucggcgacgug         | MIMAT0030019  |
| hsa-miR-5096                   | guuucaccauguuggucaggc    | MIMAT0020603* |
| hsa-miR-1260b                  | aucccaccacugccaccau      | MIMAT0015041  |
| hsa-miR-423-5p                 | ugaggggcagagagcgagacuuu  | MIMAT0004748  |
| hsa-miR-3651                   | cauagcccggucgcugguacauga | MIMAT0018071  |
| hsa-miR-5701                   | uuauugucacguucugauu      | MIMAT0022494  |
| hsa-miR-320b                   | aaaagcuggguugagagggcaa   | MIMAT0005792  |
| hsa-miR-3180-1,hsa-miR-3180-3p | uggggcggagcuuccggaggcc   | MIMAT0015058  |
| hsa-miR-3180-4,hsa-miR-3180    | uggggcggagcuuccggag      | MIMAT0018178  |
| hsa-miR-125b-1-3p              | acggguuaggcucuugggagcu   | MIMAT0004592  |
| hsa-miR-320a                   | aaaagcuggguugagagggcga   | MIMAT0000510  |
| hsa-miR-4792                   | cggugagcgcucgucggc       | MIMAT0019964* |
| hsa-miR-146a-5p                | ugagaacugaauuccauggguu   | MIMAT0000449  |
| hsa-miR-181b-5p                | aacauucauugcugucggugggu  | MIMAT0000257  |
| hsa-let-7e-5p                  | ugagguaggagguuguauaguu   | MIMAT0000066  |
| hsa-let-7i-5p                  | ugagguaguaguuuugucuguu   | MIMAT0000415  |
| hsa-let-7b-5p                  | ugagguaguagguugugugguu   | MIMAT0000063  |

\*removed from miRBASE release 22

### siRNAs

| siRNA name | seq                |
|------------|--------------------|
| si-NC      | CUCCGAACGUGUCACGUU |
| si-X1      | UGCUGCCAGUGUUUCUUA |
